# Supplementary material
Source: PubMed Central journal article supplement (PMC138545)

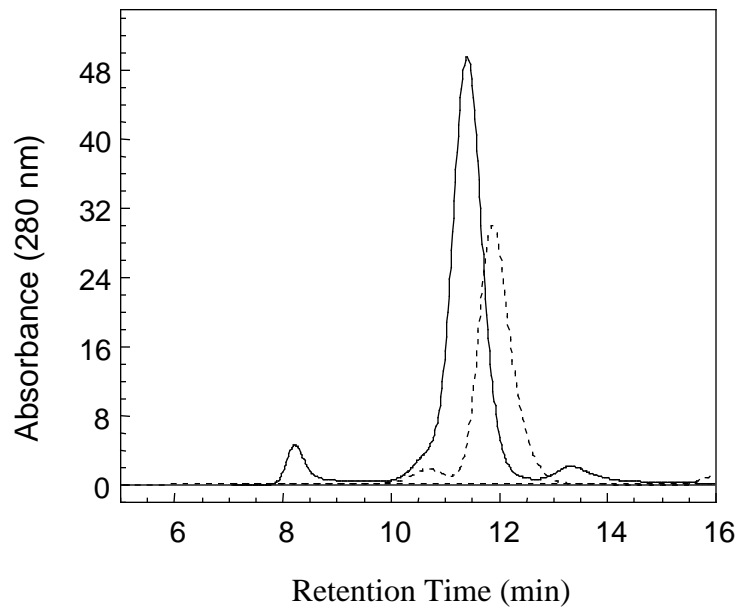

Supplement: pnas_252508399_2.pdf [file pnas_252508399_2.pdf]

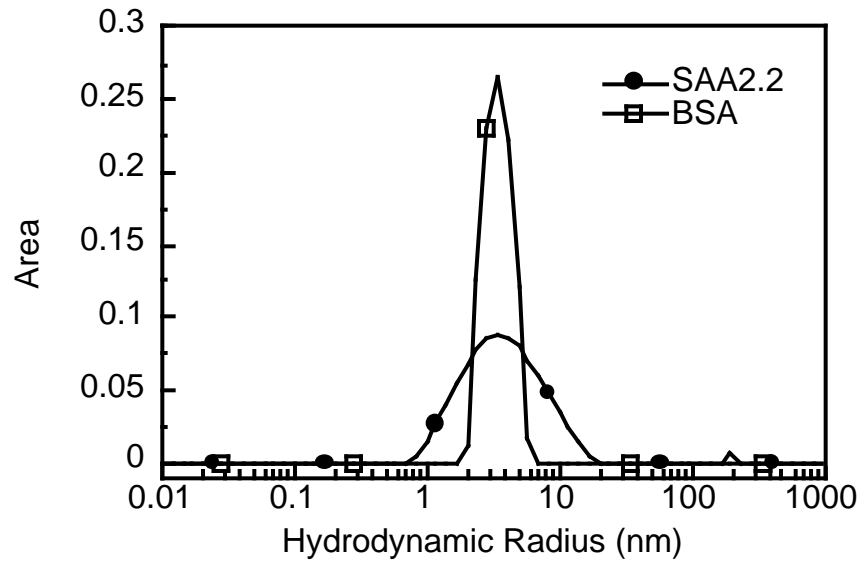

Supplement: pnas_252508399_4.pdf [file pnas_252508399_4.pdf]

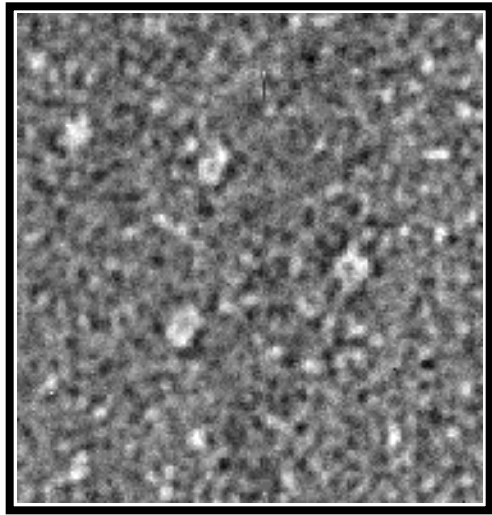

Supplement: pnas_252508399_6.pdf [file pnas_252508399_6.pdf]
